# Supplementary material
Source: Springer Nature journal article supplement (https://www.springermedizin.de/resource/supplementary/12913_2009_1150_MOESM5_ESM.pdf/9527734)
Supplement: MOESM5 [file 9527734]

117 new prescribing errors

117 new alerts

14 alerts were posted within 1 or 2 days after prescriptions written during saturday and sunday

103 alerts corresponding to errors made between monday and friday

50 alerts were overridden

46 alerts were not overridden by the physician and followed by a correction

7 alerts indeterminate (overridden or not) because corresponding to error occurred the day of the discharge or 15<sup>th</sup> day of stay
